# Supplementary material for: Using ddRADseq to assess the genetic diversity of in-farm and gene bank cacao resources in the Baracoa region, eastern Cuba, for use and conservation purposes
Source: Frontiers journal article supplement (doi:10.3389/fpls.2024.1367632), 2024-03-05
Supplement: Data_Sheet_1.PDF [file Data_Sheet_1.PDF]

## Supplementary Material

### 1 Supplementary Data

### 2 Supplementary Figures and Tables

#### 2.1 Supplementary Figures

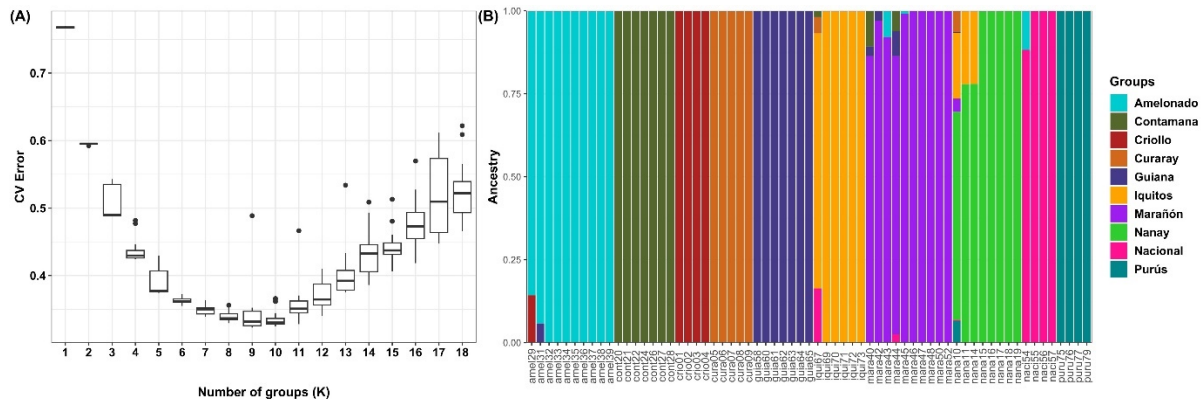

**Supplementary Figure 1.** Membership to cacao ancestry genetic groups of the 65 reference plants using the 11,425 SNPs from CG SNP dataset and ADMIXTURE was run with the cross-validation procedure described in Material and Methods. (A) CV Error vs K plot for 20 independent ADMIXTURE runs per K; horizontal lines represent the median, boxes stand for the 25 and 75 % percentiles, vertical lines point to minimum and maximum values and the dots are “outlier” data. (B) Ancestry assuming K=10, the Q-matrix of ADMIXTURE run with the best combination of low CV error and low number of iterations to convergence was selected. Plot were generated using ggplot2 package from R program.

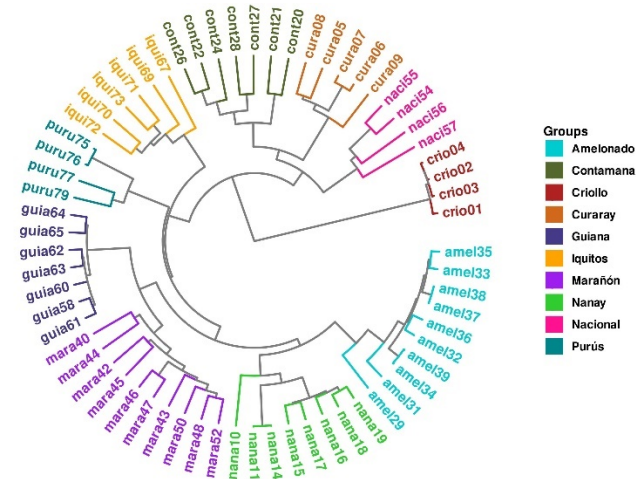

**Supplementary Figure 2.** Dendrograms of the 65 reference plants of cacao ancestry genetic groups using the 11,425 SNPs from CG SNP dataset. Clustering based on UPGMA from a Hamming distance matrix. Plot were generated using ggtree and treeio packages from R program.

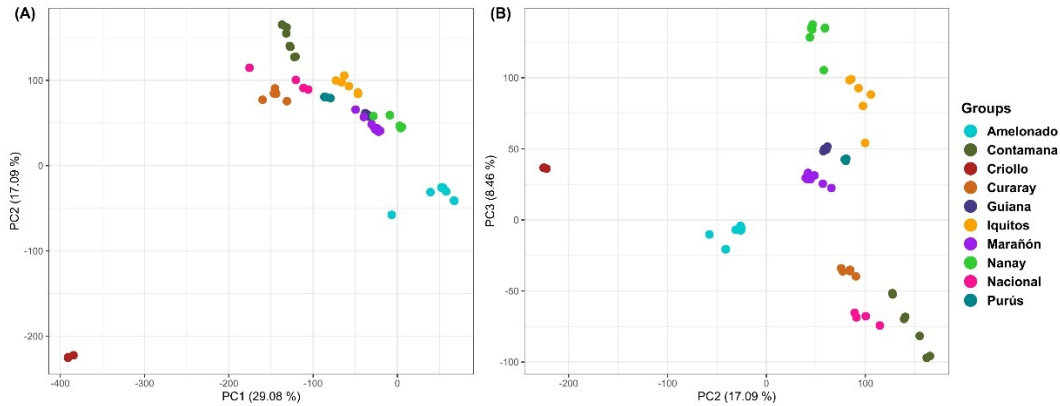

**Supplementary Figure 3.** Principal component analysis plots of the 65 reference plants of cacao ancestry genetic groups references using 11,425 SNPs from CG SNP dataset. (a) PC1 and PC3, (b) PC2 and PC3. Plots were generated using ggplot2 and ggpubr packages from R program.

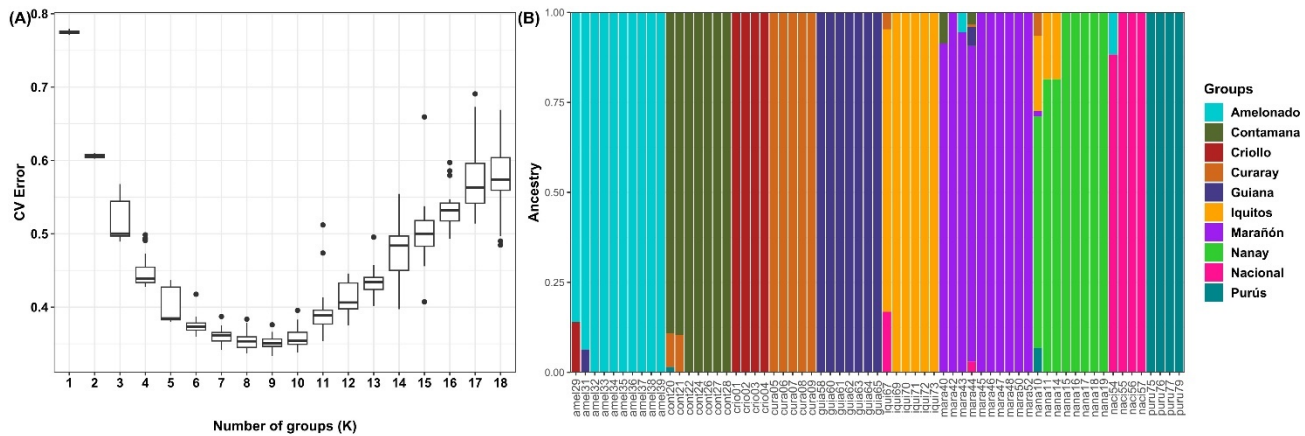

**Supplementary Figure 4.** Membership to cacao ancestry genetic groups of the 65 reference plants using the 6,481 SNPs from CF SNPs dataset. ADMIXTURE was run with the cross-validation procedure described in Material and Methods. (A) CV Error vs K plot for 20 independent ADMIXTURE runs per K; horizontal lines represent the median, boxes stand for the 25 and 75 % percentiles, vertical lines point to minimum and maximum values and the dots are “outlier” data. (B) Ancestry assuming K=10, the Q-matrix of ADMIXTURE run with the best combination of low CV error and low number of iterations to convergence was selected. Plot were generated using ggplot2 package from R program.

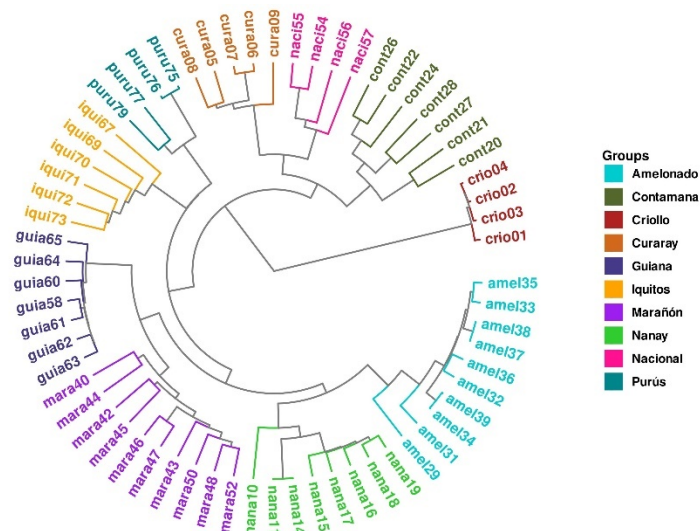

**Supplementary Figure 5.** Dendrograms of the 65 reference plants of cacao ancestry genetic groups using the 6,481 SNPs from CF SNPs dataset. Clustering based on UPGMA from a Hamming distance matrix. Plot were generated using ggtree and treeio packages from R program.

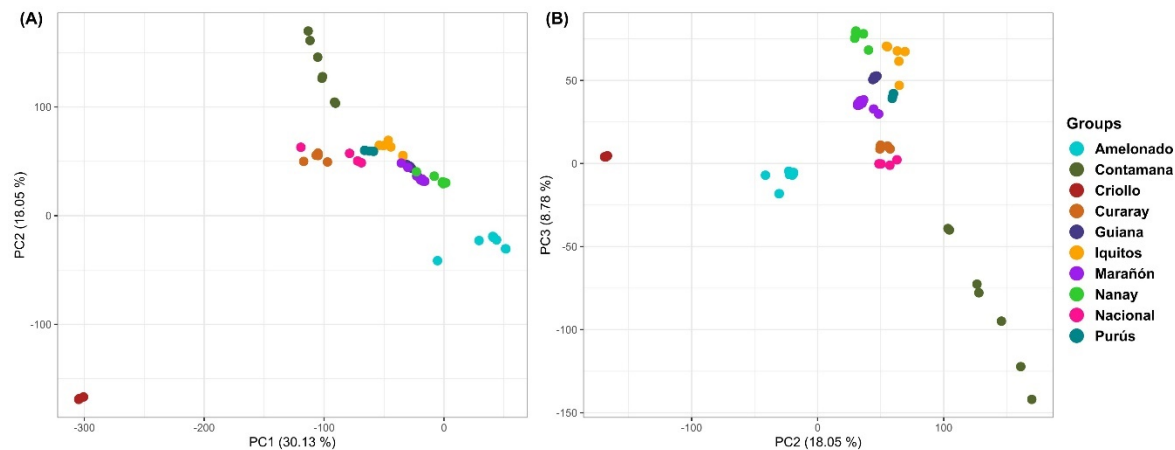

**Supplementary Figure 6.** Principal component analysis plots of the 65 reference plants of cacao ancestry genetic groups using the 6,481 SNPs from CF SNP dataset. (A) PC1 and PC3, (B) PC2 and PC3. Plots were generated using ggplot2 and ggpvr packages from R program

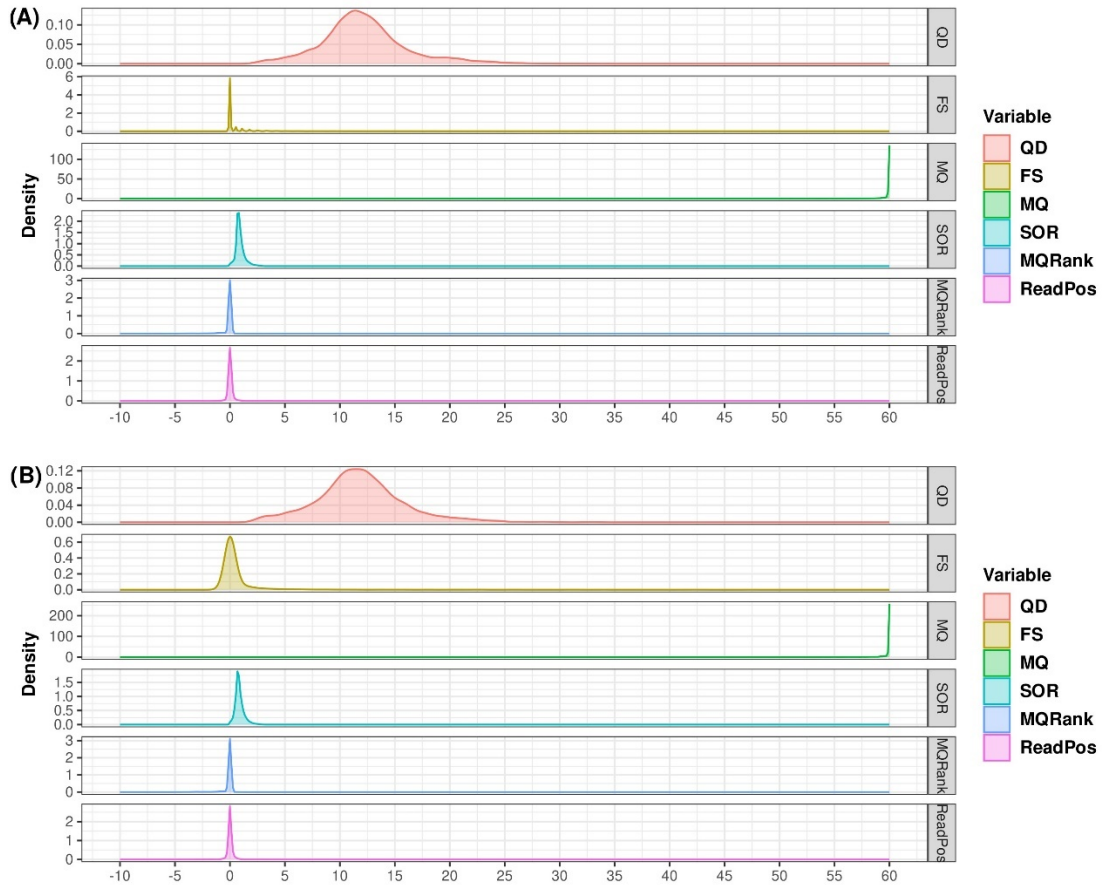

**Supplementary Figure 7.** SNPs quality check based on distribution of **QD** (*Quality by Depth*), **MQ** (*Mapping Quality*), **FS** (*Fisher Strand*), **SOR** (*Strand Odds Ratio*), **MQRank** (*Mapping Quality Rank Sum Test*) and **ReadPos** (*Read Position Rank Sum Test*) among the SNPs from CG (A) and CF (B) SNP datasets. Plots were built using ggplot and ggpubr R packages. **Note:** **QD** expected values are higher than 2 with peaks around 12 and 32. **FS**, **MQRank**, and **ReadPos** values closed to 0 suggest little or the absent of bias in the SNPs supporting data. **MQ** values around 60 (the maximum) are expected. **SOR** values should be between 0 and 3 (Caetano-Anolles, 2022).

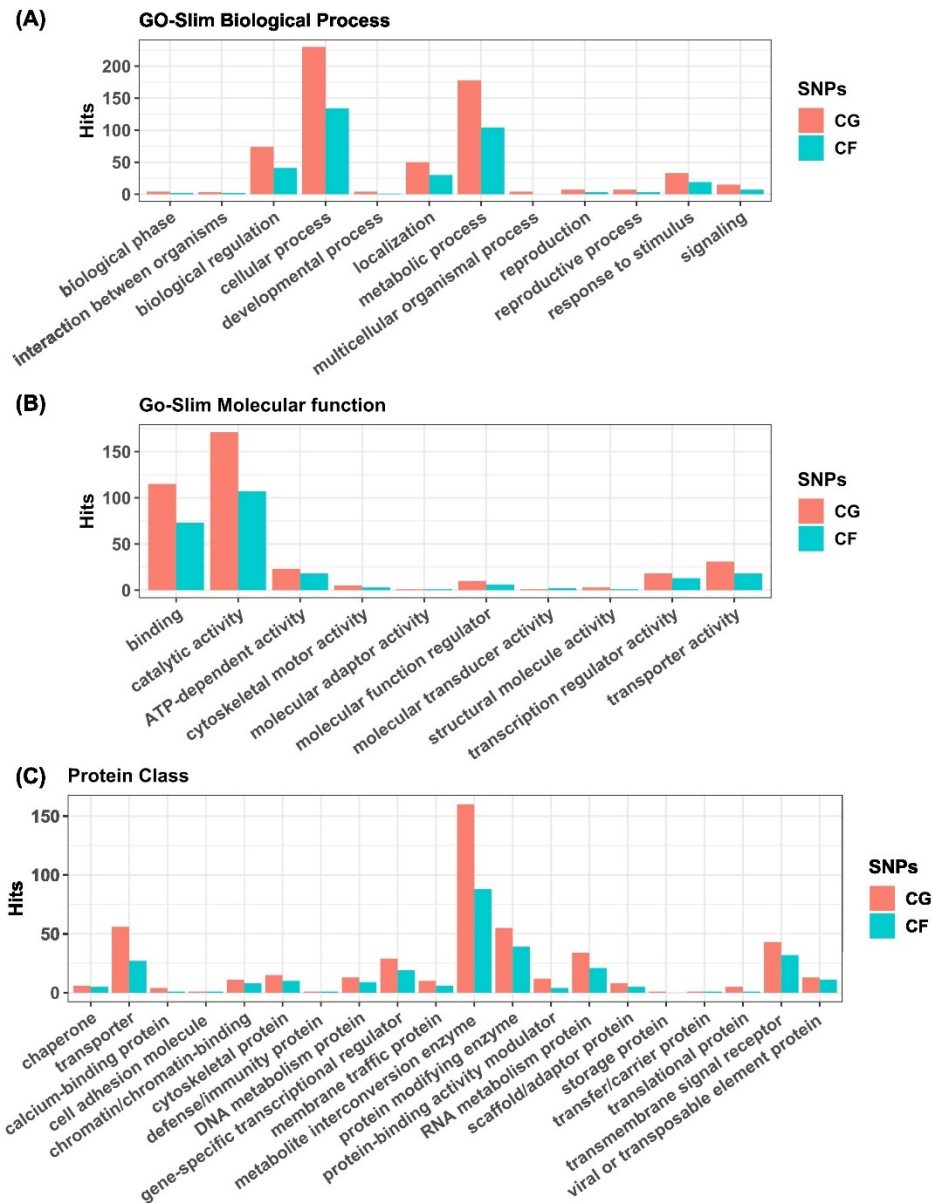

**Supplementary Figure 8.** Results of gene ontology analysis using PANTHER classification system based on gene list built from CG and CF SNP datasets annotation. Gene list contained genes carrying SNPs with moderate or high impact according to SnpEff. Hit counting with terms or categories from databases GO-Slim biological process (A), GO-Slim molecular function (B) and Protein class (C) are shown.

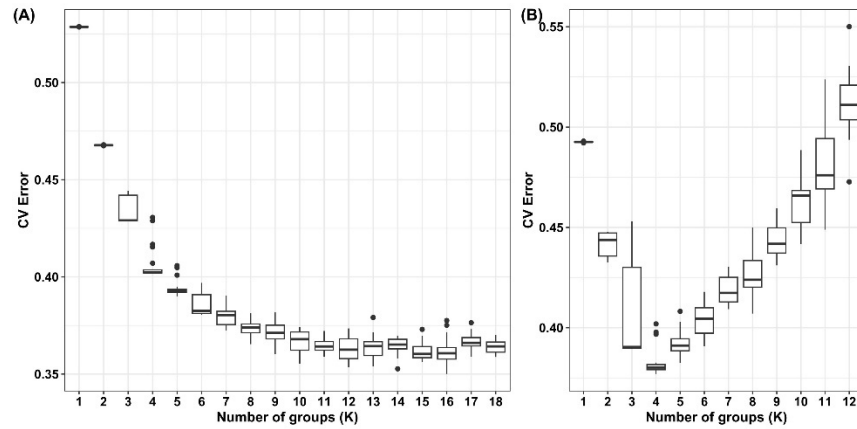

**Supplementary Figure 9.** Cross validation error (CV Error) vs number of groups (K) plots for 20 independent ADMIXTURE runs per K using the 11,425 and 6,481 SNPs from CG (A) and CF (B) samples, respectively. Horizontal lines represent the median, boxes stand for the 25 and 75 % percentiles, vertical lines point to minimum and maximum values and dots are “outlier” data.

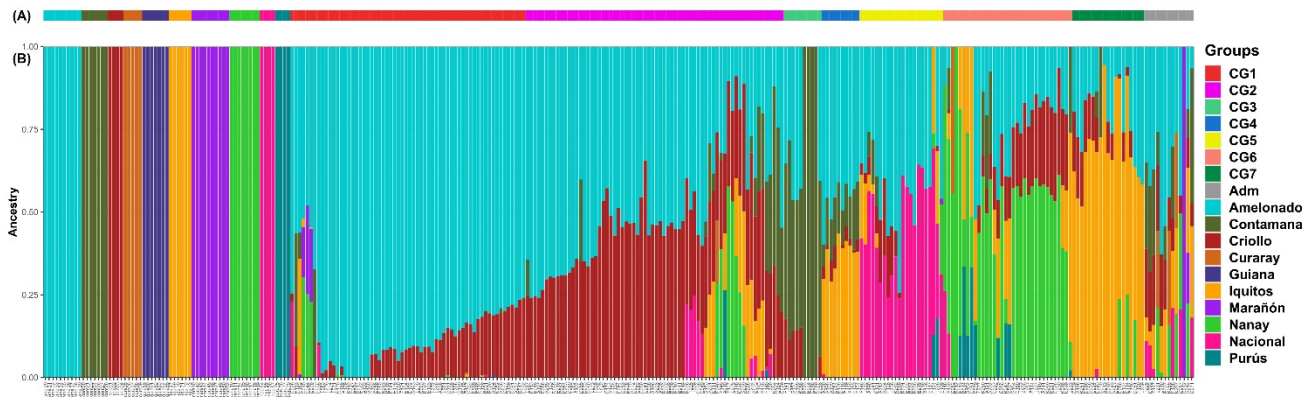

**Supplementary Figure 10.** Membership to cacao genetic groups of 238 CG plants and 65 reference plants of cacao ancestry genetic groups assuming K=10. ADMIXTURE was run under supervised mode using the 11,425 SNPs from CG SNP dataset. (A) Assignment to cacao ancestry genetic groups or CG genetic groups identified by ADMIXTURE (Figure 3, main text). (B) Membership to the cacao genetic groups identified by Motamayor *et al.* (2008). Plot was generated using ggplot2 and ggpubr packages from R program.



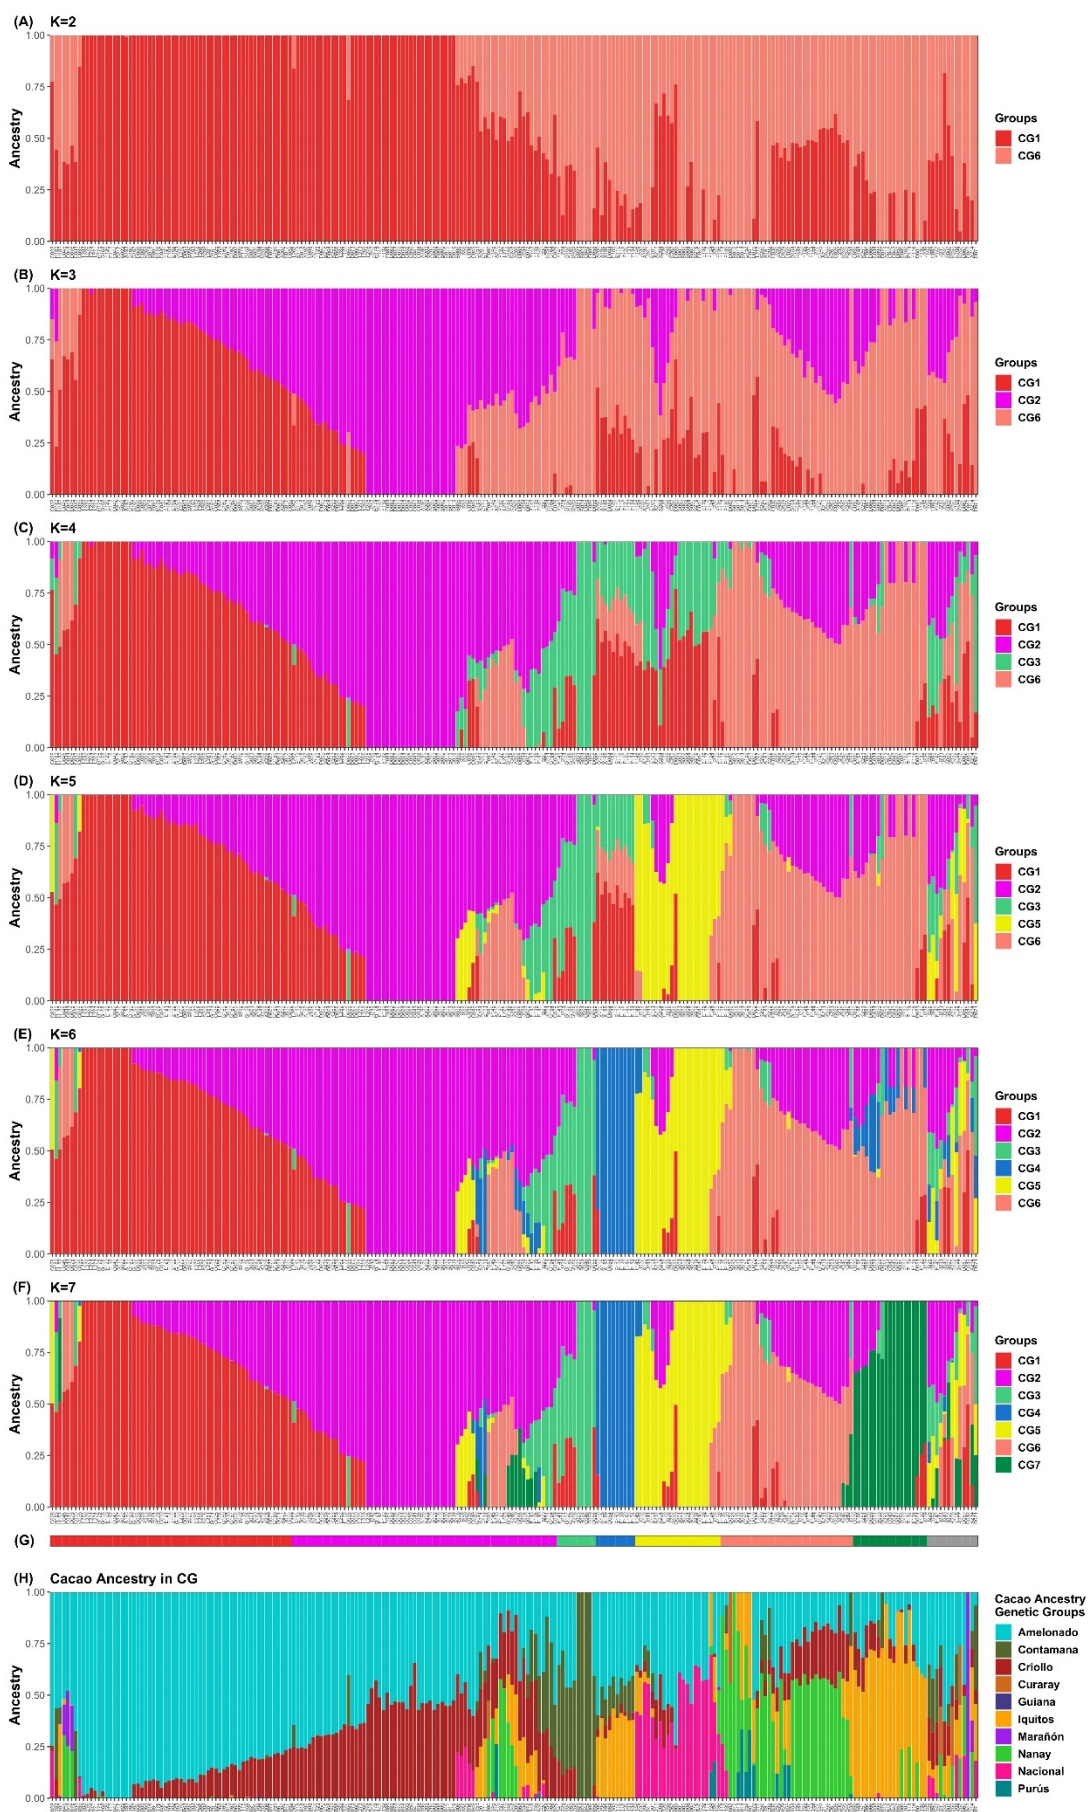

**Supplementary Figure 11 (Previous page).** Memberships of 238 CG samples according to ADMIXTURE program. Samples membership assuming K=2 (A), K=3 (B), K=4 (C), K=5 (D), K=6 (E) and K=7 (F) as estimated by ADMIXTURE using cross validation. Each column represents an individual. (G) Group assignment based on K=7, Admixed plants (“Adm” group) in grey. (H) Membership to cacao ancestry genetic groups identified by Motamayor *et al.* (2008) using ADMIXTURE under supervised mode. Ancestry plot combining CG plants and cacao reference plants is shown in Supplementary Figure 10. Plots were generated using ggplot2 and ggpubr packages from R program.

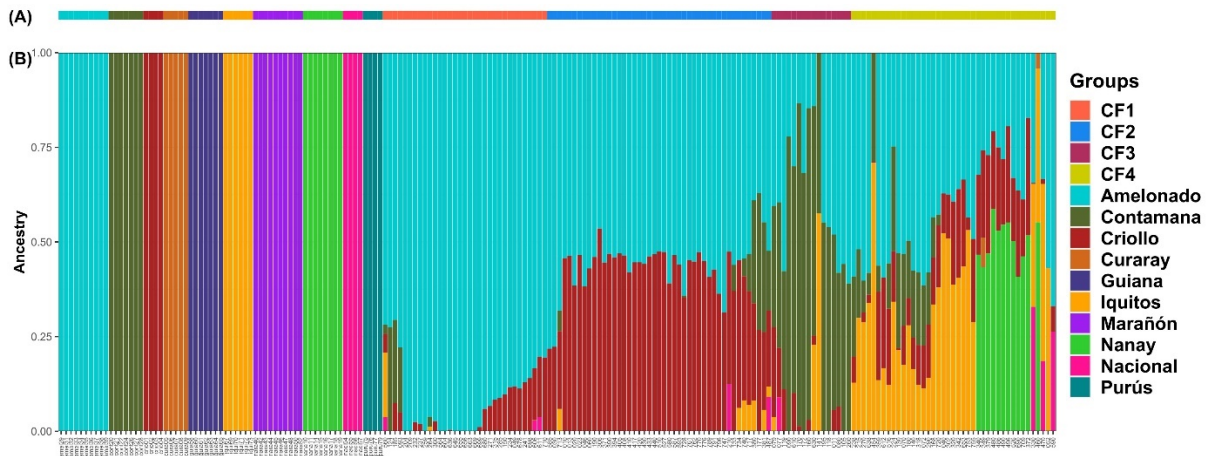

**Supplementary Figure 12.** Membership to cacao genetic groups of 135 CF plants and 65 reference plants of cacao ancestry genetic groups assuming K=10. ADMIXTURE was run under supervised mode using the 6,481 SNPs from CF SNP dataset. (A) Assignment to cacao genetic groups or CF groups identified by ADMIXTURE (Figure 6, main text). (B) Membership to the cacao genetic groups identified by Motamayor *et al.* (2008). Plot was generated using ggplot2 and ggpubr packages from R program.



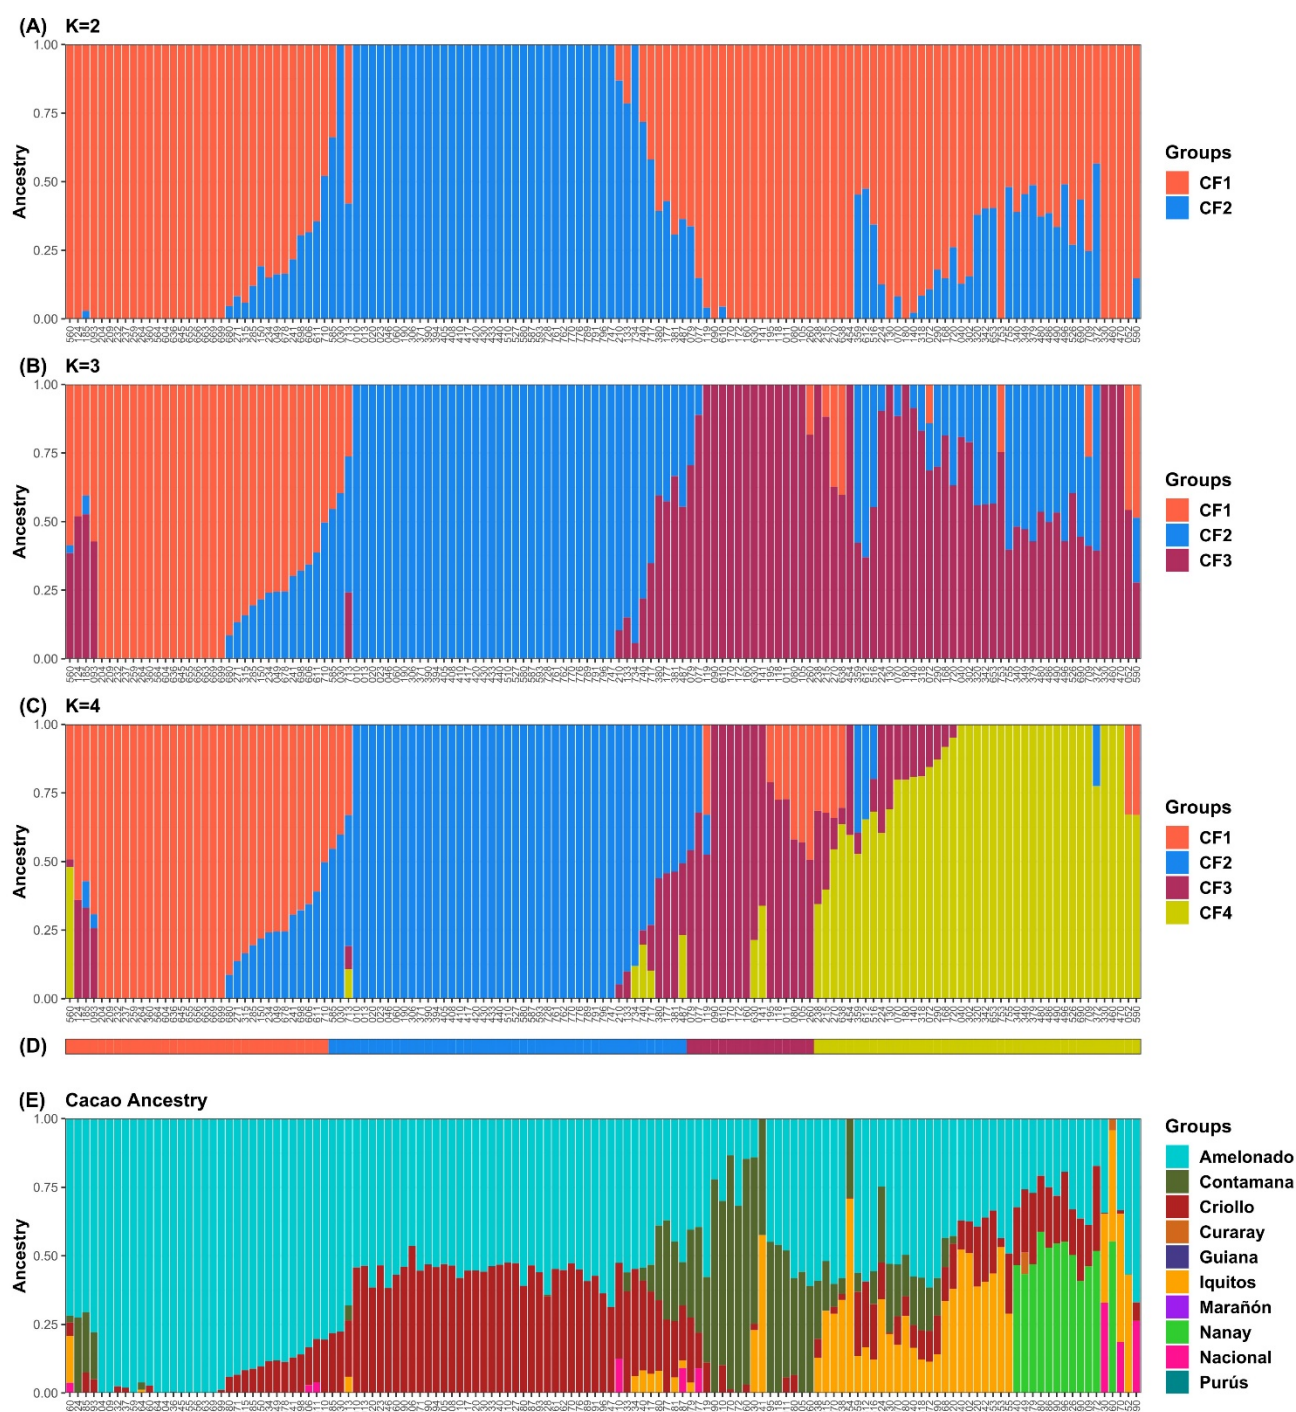

**Supplementary Figure 13.** Memberships of CF samples according to ADMIXTURE program. Samples membership assuming K=2 (A), K=3 (B) and K=4 (C) according to ADMIXTURE using cross validation. Each column represents an individual. (D) Group assignment based on K=4. (E) Membership to cacao ancestry genetic groups identified by Motamayor *et al.* (2008) using ADMIXTURE under supervised mode. Ancestry plot combining CG plants and cacao reference plants is shown in Supplementary Figure 13. Plots were generated using ggplot2 and ggpubr packages from R program.

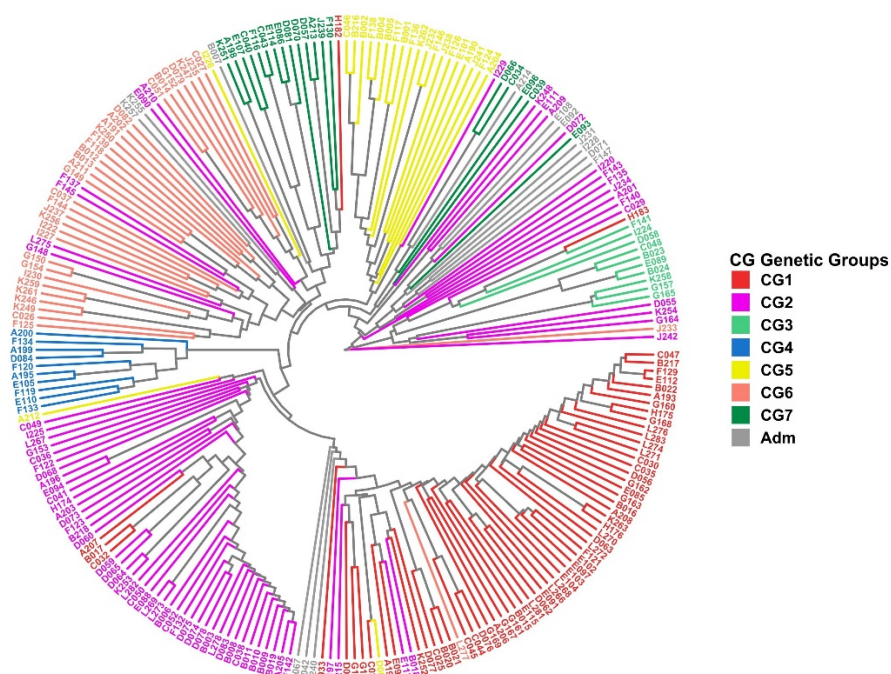

**Supplementary Figure 14.** Dendrogram with 238 CG samples. Clustering by UPGMA from a Hamming distance matrix based on the 11,425 SNPs from CG SNP dataset. CG plants coloring is based on the membership assuming K=7 from ADMIXTURE program. Plot was generated using ggtree and treeio packages from R program.

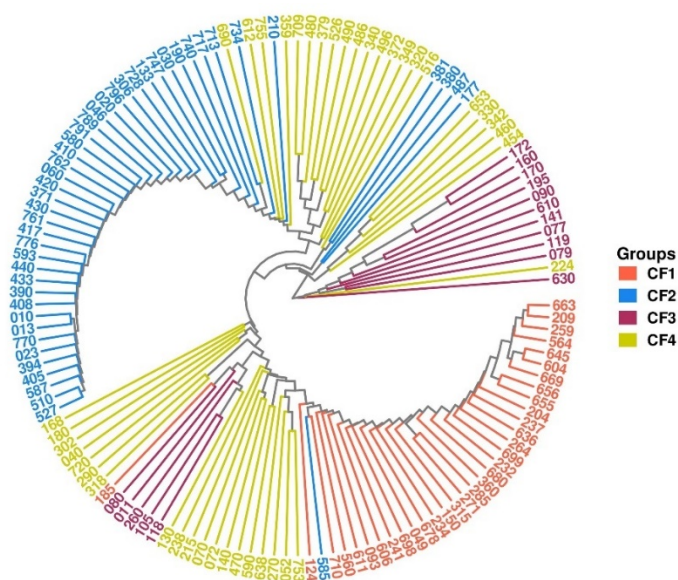

**Supplementary Figure 15.** Dendrogram with 135 cacao farms samples. Clustering by UPGMA from a Hamming distance based on the 6,481 SNPs from CF SNP dataset. CF individual coloring is based on the membership assuming K=4 from ADMIXTURE program. Plot was generated using ggtree and treeio packages from R program.

(A) CG samples and cacao references

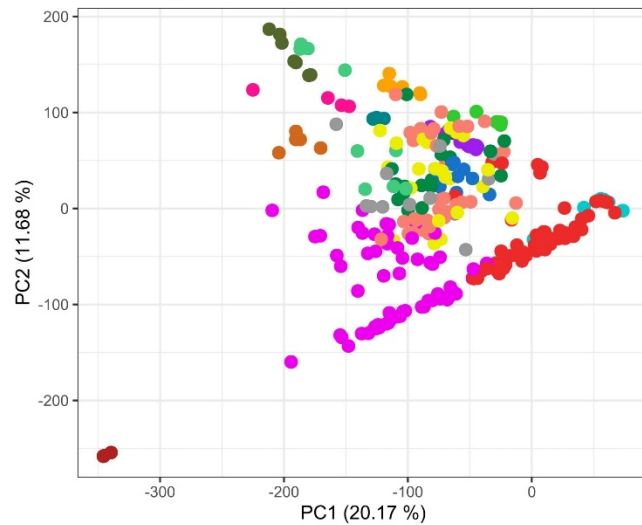

(B) CG samples and cacao references

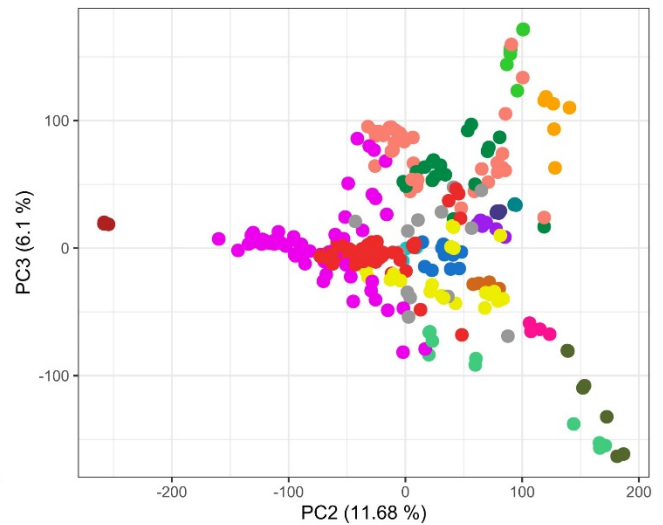

Groups

|           |         |          |     |     |
|-----------|---------|----------|-----|-----|
| Amelonado | Guiana  | Nacional | CG3 | CG7 |
| Contamana | Iquitos | Purús    | CG4 | Adm |
| Criollo   | Marañón | CG1      | CG5 |     |
| Curaray   | Nanay   | CG2      | CG6 |     |

(C) CF samples and cacao references

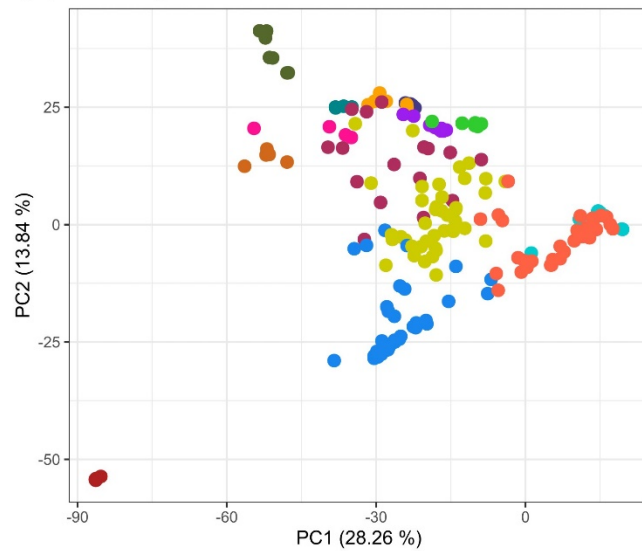

(D) CF samples and cacao references

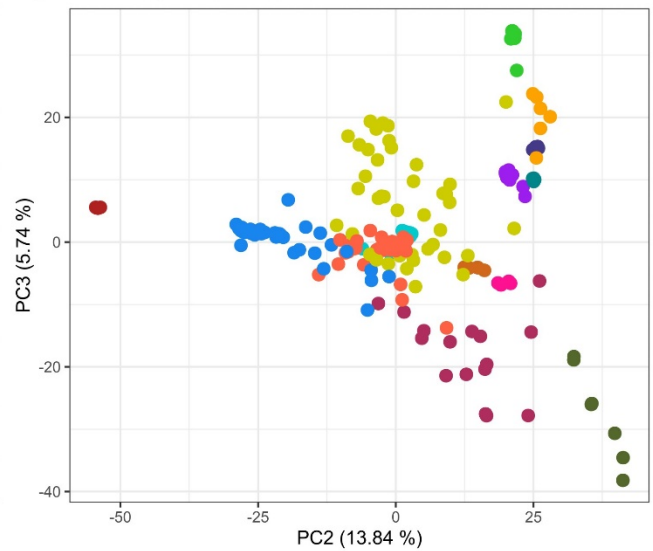

Groups

|           |         |          |       |     |
|-----------|---------|----------|-------|-----|
| Amelonado | Curaray | Marañón  | Purús | CF3 |
| Contamana | Guiana  | Nanay    | CF1   | CF4 |
| Criollo   | Iquitos | Nacional | CF2   |     |

**Supplementary Figure 16.** Principal component analysis plots of the 238 CG samples and 65 cacao genetic groups references using the 11,481 SNPs from CC SNPs dataset (A and B) and the 135 CF samples and 65 cacao genetic groups references using the 6,481 SNPs from CF SNPs dataset (C and D). (A) PC1 and PC2 of CG and reference plants, (B) PC2 and PC3 PC2 of CG and reference plants. (A) PC1 and PC of CF and reference plants, (B) PC2 and PC3 of CF and reference plants. Samples coloring is based on membership assuming K=7 for CG samples, membership assuming K=4 for CF samples and cacao ancestry genetic groups for reference plants. Plots were generated using ggplot2 and ggpubr packages from R program.

## 2.2 Supplementary Tables

**Supplementary Table 1.** Details of the cacao farms used for sampling purpose.

| Farm ID | Productive Pole          | Farm Name         | Farm Type | Cacao plants origin            | North Coordinate | West Coordinate | Farm Size (ha) | Plots (Unit) | Sampled Plant (Unit) |
|---------|--------------------------|-------------------|-----------|--------------------------------|------------------|-----------------|----------------|--------------|----------------------|
| F08     | Jamal                    | Finca Los Yaser   | 4         | Traditional / Hybrid / Grafted | 20°16,413' N     | 74°25,644' W    | 16             | 8            | 40                   |
| F15     | Jamal                    | Santa Rita        | 4         | Traditional / Hybrid / Grafted | 20°16,638' N     | 74°25,521' W    | 9,45           | 5            | 25                   |
| F02     | San Luis                 | Finca Santa María | 3         | Traditional / Hybrid           | 20°18,730' N     | 74°25,610' W    | 11,7           | 3            | 15                   |
| F19     | San Luis                 | La Esperanza I    | 2         | Grafted                        | 20°17,698' N     | 74°26,779' W    | 3              | 3            | 15                   |
| F05     | Paso de Cuba / Sabanilla | Finca Elcita      | 1         | Hybrid / Grafted               | 20°17,101' N     | 74°27,907' W    | 5,33           | 3            | 15                   |
| F10     | Paso de Cuba / Sabanilla | Finca San Miguel  | 1         | Hybrid / Grafted               | 20°15,577' N     | 74°27,713' W    | 6,66           | 6            | 30                   |
| F11     | Paso de Cuba / Sabanilla | Poca Pena         | 2         | Grafted                        | 20°15,192' N     | 74°27,625' W    | 8,5            | 4            | 20                   |

**Note:** **Farm type** as described in Materials and Methods. **Farm size** refers to total amount of hectare of the farm not only to the cacao planted area. **Plot** is number of plots raised in the cacao plantation. **Sampled Plant** refers to the number of plants collected for analysis purposes in the farm.



**Supplementary Table 2.** List of clones used as references plants of cacao ancestry genetic groups according to Cornejo *et al.*, (2018).

| ID     | Plant Code       | Genetic Group | ID     | Plant Code   | Genetic Group |
|--------|------------------|---------------|--------|--------------|---------------|
| crio01 | Criollo          | Criollo       | mara40 | PA – 218     | Marañón       |
| crio02 | Sp1              |               | mara42 | PA – 150     |               |
| crio03 | Sp3              |               | mara43 | PA – 51      |               |
| crio04 | Sp9              |               | mara44 | PA – 107     |               |
| cura05 | Cur 3 G39 - A10  | Curaray       | mara45 | PA – 169     |               |
| cura06 | Cur 3 G37 - A6   |               | mara46 | MO – 4       |               |
| cura07 | Cur 3 G38 - A8   |               | mara47 | MO – 9       |               |
| cura08 | LCTEEN - 141     |               | mara48 | PA 289       |               |
| cura09 | SIL -1-G56-A6    | Nanay         | mara50 | PA -56       |               |
| nana10 | SPEC - 194 75    |               | mara52 | PA -121      |               |
| nana11 | Pound 7          |               | naci54 | UF 273 T1    | Nacional      |
| nana14 | Pound 7B         |               | naci55 | UF 273 T2    |               |
| nana15 | Pound 10-B       |               | naci56 | AM -1 -54    |               |
| nana16 | NA - 92          |               | naci57 | Brisas -1    |               |
| nana17 | NA - 331         | Contamana     | guia58 | GU - 308A    | Guiana        |
| nana18 | NA - 286         |               | guia60 | GU -300 P    |               |
| nana19 | NA - 702         |               | guia61 | GU – 222     |               |
| cont20 | NH - 53          |               | guia62 | GU - 291F    |               |
| cont21 | NH - 40          | Amelonado     | guia63 | GU - 175P    | Iquitos       |
| cont22 | T 695 -SCA6 - A1 |               | guia64 | GU - 114P    |               |
| cont24 | SCA 24.2         |               | guia65 | GU - 255V    |               |
| cont26 | SCA -11          |               | iqui67 | IMC – 51     |               |
| cont27 | PMF - 27         |               | iqui69 | IMC – 12     |               |
| cont28 | PMF - 20         | Purús         | iqui70 | IMC – 50     |               |
| amel29 | TRD86            |               | iqui71 | IMC – 20     |               |
| amel31 | REDAMEL 1-31     |               | iqui72 | IMC -67      |               |
| amel32 | SIAL 84          |               | iqui73 | IMC – 14     |               |
| amel33 | SIAL 70          |               | puru75 | CAB 77 - PL5 |               |
| amel34 | SIC 806          |               | puru76 | CAB 76 - PL3 |               |
| amel35 | mvP30            |               | puru77 | RB 47 - PL3  |               |
| amel36 | SIAL 169         |               | puru79 | RB 39 - PL1  |               |
| amel37 | Matina           |               |        |              |               |
| amel38 | Matina Tica 2    |               |        |              |               |
| amel39 | Catongo          |               |        |              |               |

**Legend: ID:** Identifier used in this study, **Plant Code:** Code as Cornejo *et al.* (2018), **Genetic Group:** Plant memberships to cacao ancestry genetic groups defined by Motamayor *et al.* (2008) and assigned by Cornejo *et al.* (2018). **Note:** Sequence data were downloaded from NCBI (*BioProject* PRJNA486011) using SRA toolkit v2.11.0 (SRA Toolkit Development Team, 2022) and processed as described (Cornejo *et al.*, 2018). The identified SNPs were confirmed with the SNP list deposited in European Variation Archive (<https://www.ebi.ac.uk/eva/>, Project accession code PRJEB28591).



**Supplementary Table 3.** AMOVA results of reference plants of cacao ancestry genetic groups using the 11,425 SNP from of CG SNP dataset.

| Source of Variation | Df | SS         | MS        | Sigma    | Variance (%) |
|---------------------|----|------------|-----------|----------|--------------|
| Between groups      | 9  | 131,092.75 | 14,565.86 | 2,167.56 | 76.76        |
| Within groups       | 55 | 36,102.11  | 656.40    | 656.40   | 23.24        |
| Total               | 64 | 167,194.86 | 2,612.42  | 2,823.97 | 100.00       |

**Legend:** **Df:** Degree of freedom, **SS:** Square Sum, **MS:** Mean Square. Highly significant values with  $p < 0.001$ .

**Supplementary Table 4.** Fst pairwise comparison among the reference plants of cacao ancestry genetic groups using the 11,425 SNPs from CG SNP dataset.

|             | Amel  | Cont  | Crio  | Cura  | Guia  | Iqui  | Mara  | Nana  | Naci  | <b>Legend:</b>         |
|-------------|-------|-------|-------|-------|-------|-------|-------|-------|-------|------------------------|
| <b>Cont</b> | 0.709 |       |       |       |       |       |       |       |       | <b>Amel:</b> Amelonado |
| <b>Crio</b> | 0.923 | 0.773 |       |       |       |       |       |       |       | <b>Cont:</b> Contamana |
| <b>Cura</b> | 0.794 | 0.456 | 0.824 |       |       |       |       |       |       | <b>Crio:</b> Criollo   |
| <b>Guia</b> | 0.749 | 0.630 | 0.926 | 0.750 |       |       |       |       |       | <b>Cura:</b> Curaray   |
| <b>Iqui</b> | 0.558 | 0.433 | 0.762 | 0.501 | 0.550 |       |       |       |       | <b>Guia:</b> Guiana    |
| <b>Mara</b> | 0.478 | 0.486 | 0.790 | 0.567 | 0.401 | 0.379 |       |       |       | <b>Iqui:</b> Iquitos   |
| <b>Nana</b> | 0.608 | 0.625 | 0.872 | 0.705 | 0.676 | 0.367 | 0.474 |       |       | <b>Mara:</b> Marañón   |
| <b>Naci</b> | 0.712 | 0.414 | 0.796 | 0.457 | 0.681 | 0.412 | 0.502 | 0.636 |       | <b>Nana:</b> Nanay     |
| <b>Puru</b> | 0.718 | 0.447 | 0.846 | 0.568 | 0.659 | 0.381 | 0.429 | 0.579 | 0.504 | <b>Naci:</b> Nacional  |
|             |       |       |       |       |       |       |       |       |       | <b>Puru:</b> Purús     |

**Note:** All Fst values were significant ( $p=0$ ).

**Supplementary Table 5.** AMOVA results of the reference plants of cacao ancestry genetic groups using the 6,481 SNPs of CF SNP datasets.

| Source of Variation | Df | SS        | MS       | Sigma    | Variance (%) |
|---------------------|----|-----------|----------|----------|--------------|
| Between Groups      | 9  | 70,074.10 | 7,786.01 | 1,158.79 | 76.81        |
| Within Groups       | 55 | 19,246.08 | 349.93   | 349.93   | 23.19        |
| Total               | 64 | 89,320.17 | 1,395.63 | 1,508.72 | 100.00       |

**Legend:** **Df:** Degree of freedom, **SS:** Square Sum, **MS:** Mean Square. Highly significant values with  $p < 0.001$ .

**Supplementary Table 6.** Fst pairwise comparison among the 65 reference plants of cacao ancestry genetic groups reference plants using the 6,841 SNPs from CF SNP dataset.

|             | <b>Amel</b> | <b>Cont</b> | <b>Crio</b> | <b>Cura</b> | <b>Guia</b> | <b>Iqui</b> | <b>Mara</b> | <b>Nana</b> | <b>Naci</b> | <b>Legend:</b><br><b>Amel:</b> Amelonado<br><b>Cont:</b> Contamana<br><b>Crio:</b> Criollo<br><b>Cura:</b> Curaray<br><b>Guia:</b> Guiana<br><b>Iqui:</b> Iquitos<br><b>Mara:</b> Marañón<br><b>Nana:</b> Nanay<br><b>Naci:</b> Nacional<br><b>Puru:</b> Purús |
|-------------|-------------|-------------|-------------|-------------|-------------|-------------|-------------|-------------|-------------|----------------------------------------------------------------------------------------------------------------------------------------------------------------------------------------------------------------------------------------------------------------|
| <b>Cont</b> | 0.711       |             |             |             |             |             |             |             |             |                                                                                                                                                                                                                                                                |
| <b>Crio</b> | 0.926       | 0.769       |             |             |             |             |             |             |             |                                                                                                                                                                                                                                                                |
| <b>Cura</b> | 0.800       | 0.465       | 0.834       |             |             |             |             |             |             |                                                                                                                                                                                                                                                                |
| <b>Guia</b> | 0.756       | 0.621       | 0.927       | 0.749       |             |             |             |             |             |                                                                                                                                                                                                                                                                |
| <b>Iqui</b> | 0.582       | 0.450       | 0.782       | 0.516       | 0.568       |             |             |             |             |                                                                                                                                                                                                                                                                |
| <b>Mara</b> | 0.487       | 0.495       | 0.797       | 0.568       | 0.393       | 0.387       |             |             |             |                                                                                                                                                                                                                                                                |
| <b>Nana</b> | 0.620       | 0.626       | 0.883       | 0.713       | 0.687       | 0.370       | 0.477       |             |             |                                                                                                                                                                                                                                                                |
| <b>Naci</b> | 0.698       | 0.394       | 0.801       | 0.451       | 0.658       | 0.396       | 0.463       | 0.617       |             |                                                                                                                                                                                                                                                                |
| <b>Puru</b> | 0.725       | 0.445       | 0.852       | 0.582       | 0.661       | 0.389       | 0.426       | 0.585       | 0.478       |                                                                                                                                                                                                                                                                |

**Note:** All Fst values were significant (p=0).

**Supplementary Table 7.** Transition and transversion statistics in CG and CF SNP datasets.

| <b>Change (Type)</b> | <b>Cacao Gene Bank</b> |          | <b>Cacao Farms</b> |          |
|----------------------|------------------------|----------|--------------------|----------|
|                      | <b>Count</b>           | <b>%</b> | <b>Count</b>       | <b>%</b> |
| Total SNPs           | 11,425                 | 100      | 6,481              | 100      |
| C/T                  | 3,608                  | 31.58    | 1,995              | 30.78    |
| A/G                  | 3,501                  | 30.64    | 2,041              | 31.49    |
| <b>Ts</b>            | <b>7,109</b>           |          | <b>4,036</b>       |          |
| C/G                  | 765                    | 6.70     | 457                | 7.05     |
| G/T                  | 1,138                  | 9.96     | 634                | 9.78     |
| A/C                  | 1,112                  | 9.73     | 620                | 9.57     |
| A/T                  | 1,301                  | 11.39    | 734                | 11.33    |
| <b>Tv</b>            | <b>4,316</b>           |          | <b>2,445</b>       |          |
| <b>Ts/Tv</b>         | <b>1.647</b>           |          | <b>1.651</b>       |          |

**Legend: Change:** Refers to the substitution type, **Count:** numbers of changes, **C:** Cytosine, **T:** Thymine, **A:** Adenine, **G:** Guanine, **Ts:** Transitions, **Tv:** Transversions, **Ts/Tv:** Transitions/Transversions ratio.

**Supplementary Table 8.** Q-matrices matching the high membership premise for each K value assessed with CG samples.

| K  | No of<br>ADMIXTURE<br>runs for each K<br>value | Q-matrices<br>matching the<br>premise | Q-matrices no<br>matching the<br>premise |
|----|------------------------------------------------|---------------------------------------|------------------------------------------|
| 2  | 20                                             | 20                                    | 0                                        |
| 3  | 20                                             | 20                                    | 0                                        |
| 4  | 20                                             | 20                                    | 0                                        |
| 5  | 20                                             | 19                                    | 1                                        |
| 6  | 20                                             | 17                                    | 3                                        |
| 7  | 20                                             | 9                                     | 11                                       |
| 8  | 20                                             | 3                                     | 17                                       |
| 9  | 20                                             | 4                                     | 16                                       |
| 10 | 20                                             | 2                                     | 18                                       |
| 11 | 20                                             | 0                                     | 20                                       |
| 12 | 20                                             | 0                                     | 20                                       |
| 13 | 20                                             | 0                                     | 20                                       |
| 14 | 20                                             | 0                                     | 20                                       |
| 15 | 20                                             | 0                                     | 20                                       |
| 16 | 20                                             | 0                                     | 20                                       |
| 17 | 20                                             | 0                                     | 20                                       |
| 18 | 20                                             | 0                                     | 20                                       |
